# Supplementary material
Source: HighWire-hosted journal article supplement (https://www.cmaj.ca/highwire/filestream/58089/field_highwire_adjunct_files/0/water-eggertson-onlineappendix.pdf)
Supplement: water-eggertson-onlineappendix.pdf [file water-eggertson-onlineappendix.pdf]

## Appendix 1: First Nations Communities with Drinking Water Advisories as of February 29<sup>th</sup>, 2008

The number of Drinking Water Advisories in First Nations communities across Canada fluctuates, as water quality is not static and frequently changes. As of February 29<sup>th</sup>, 2008, 93 communities were under a Drinking Water Advisory. 88 were under Boil Water Advisories, 4 were under Do Not Consume Advisories, and 1 community was under a Boil Water Advisory and a Do Not Consume Advisory. A Boil Water Advisory and a Do Not Consume Advisory are recommended by an Environmental Health Officer employed by Health Canada or a First Nation.

Drinking water advisories are preventive measures to protect public health from waterborne contaminants that could be, or are known to be, present in drinking water. They include boil water advisories and "do not consume" advisories. Boil water advisories are a way to advise the public that they should boil their tap water for drinking and for other uses, such as brushing teeth. Do not consume advisories are a way to advise the public that they should use an alternative source of drinking water, like bottled water, for drinking and for other uses.

Note (1): The reasons listed below for Drinking Water Advisories indicate the reasons Health Canada originally recommended these advisories be put in place, and are not necessarily reflective of the current situation following any corrective measures or upgrades that may have occurred in addressing the issue. For further information on remedial action taken in these communities, please contact Indian and Northern Affairs Canada and/or Health Canada.

Note (2): The date set represents the latest day that the Drinking Water Advisory was issued by the First Nations community. Drinking Water Advisories could have been set and revoked prior to these dates.

| Atlantic |               |               |                  |                          |                               |                                                                                                                |
|----------|---------------|---------------|------------------|--------------------------|-------------------------------|----------------------------------------------------------------------------------------------------------------|
|          | First Nation  | Community     | Type of advisory | Date Set*                | Population/ building affected | Trigger                                                                                                        |
| 1        | Abegweit      | Rocky Point   | BWA              | 01/10/2008               | 40 people                     | - unacceptable microbiological quality                                                                         |
| 2        | Indian Island | Indian Island | BWA              | 04/07/2005<br>20/08/2007 | 2 public buildings            | - unacceptable microbiological quality                                                                         |
| 3        | Millbrook     | Sheet Harbour | DNC              | 09/15/2006               | 1 public building             | - significant deterioration in source water quality                                                            |
| 4        | Pabineau      | Pabineau      | BWA              | 06/01/2005               | 70 people                     | - equipment malfunction during treatment or distribution<br>- inadequate disinfection or disinfectant residual |
| 5        | Tobique       | Tobique       | BWA              | 07/19/2007               | 12 people                     | - unacceptable microbiological quality<br>- unacceptable turbidities or particle counts                        |
| 6        | Woodstock     | Woodstock     | BWA              | 03/01/2005               | 3 public buildings            | - inadequate disinfection or disinfectant residual<br>- unacceptable microbiological quality                   |

| Quebec |              |              |                  |            |                               |                                |
|--------|--------------|--------------|------------------|------------|-------------------------------|--------------------------------|
|        | First Nation | Community    | Type of advisory | Date Set   | Population/ building affected | Trigger                        |
| 1      | Kitigan Zibi | Kitigan Zibi | DNC              | 05/04/2004 | 400 houses                    | -unacceptable level of uranium |

| Ontario       |                          |                             |                  |                                        |                                   |                                                                                                                                                                                                           |
|---------------|--------------------------|-----------------------------|------------------|----------------------------------------|-----------------------------------|-----------------------------------------------------------------------------------------------------------------------------------------------------------------------------------------------------------|
|               | First Nation             | Community                   | Type of advisory | Date Set                               | Population/ building affected     | Trigger                                                                                                                                                                                                   |
| Moose Factory |                          |                             |                  |                                        |                                   |                                                                                                                                                                                                           |
| 1             | Taykwa Tagamou           | Taykwa Tagamou              | BWA              | 11/02/2005                             | 93 people                         | - inadequate disinfection or disinfectant residual                                                                                                                                                        |
| 2             | Weenusk                  | Peawanuck                   | BWA              | 2/15/2006                              | 303 people                        | - inadequate disinfection or disinfectant residual                                                                                                                                                        |
| Sioux Lookout |                          |                             |                  |                                        |                                   |                                                                                                                                                                                                           |
| 3             | Bearskin Lake            | Bearskin Lake               | BWA              | 02/21/2002<br>03/21/2006               | 1 public building &<br>462 people | - unacceptable turbidities or particle counts<br>- equipment malfunction during treatment or distribution<br>- unacceptable microbiological quality                                                       |
|               |                          |                             | DNC              | 03/21/2006                             | 1 public building                 | -operation of system will compromise public health                                                                                                                                                        |
| 4             | Cat Lake                 | Cat Lake<br>(2 CWS & 1 PWS) | BWA              | 10/13/2006<br>03/20/2007<br>06/25/2007 |                                   | - equipment malfunction during treatment or distribution<br>- inadequate disinfection or disinfectant residual<br>- unacceptable turbidities or particle counts<br>- unacceptable microbiological quality |
| 5             | Deer Lake                | Deer Lake                   | BWA              | 11/01/2001<br>04/17/2003               | 30 people                         | - inadequate disinfection or disinfectant residual<br>- unacceptable microbiological quality                                                                                                              |
| 6             | Eabametoong First Nation | Eabametoong                 | BWA              | 08/01/2001                             | 1041 people                       | - inadequate disinfection or disinfectant residual                                                                                                                                                        |
| 7             | Eagle Lake               | Eagle Lake                  | BWA              | 05/04/2006                             | 1 public building                 | -equipment malfunction during treatment or distribution                                                                                                                                                   |
| 8             | Kee-way-win              | Kee-way-win                 | DNC              | 06/23/2004                             | 425 people                        | -operation of system will compromise public health                                                                                                                                                        |
| 9             | Kingfisher               | Kingfisher                  | BWA              | 10/22/2004                             | 202 people                        | - equipment malfunction during treatment or distribution                                                                                                                                                  |

|                    |                                           |                                                                 |     |                                        |                                     |                                                                                                                                                                              |
|--------------------|-------------------------------------------|-----------------------------------------------------------------|-----|----------------------------------------|-------------------------------------|------------------------------------------------------------------------------------------------------------------------------------------------------------------------------|
|                    |                                           | lake                                                            |     |                                        |                                     | - inadequate disinfection or disinfectant residual                                                                                                                           |
| 10                 | Kitchenuhmay<br>Koosib Inninuwug          | Big Trout Lake                                                  | BWA | 11/18/2005                             | 925 people                          | - equipment malfunction during treatment or distribution<br>(engineering and operational issues need to be addressed)                                                        |
| 11                 | Lac Seul                                  | Kejick Bay                                                      | BWA | 02/14/2003                             | 500 people                          | - significant deterioration in the source water quality                                                                                                                      |
| 12                 | Lac Seul                                  | Whitefish Bay                                                   | BWA | 10/31/2002                             | 250 people                          | - significant deterioration in the source water quality<br>-inadequate disinfection or disinfectant residual                                                                 |
| 13                 | Muskrat Dam Lake                          | Muskrat Dam                                                     | BWA | 10/24/2003                             | 297 people                          | - inadequate disinfection or disinfectant residuals,<br>- unacceptable turbidities or particle counts,                                                                       |
| 14                 | Neskantaga First<br>Nation                | Neskantaga                                                      | BWA | 02/01/1995                             | 282 people                          | - inadequate disinfection or disinfectant residuals                                                                                                                          |
| 15                 | Nibinamik First<br>Nation                 | Nibinamik                                                       | BWA | 03/23/2007                             | 304 people                          | - equipment malfunction during treatment or distribution                                                                                                                     |
| 16                 | North Caribou Lake                        | North Caribou<br>lake                                           | BWA | 11/08/2006                             | 699 people                          | -equipment malfunction during treatment or distribution                                                                                                                      |
| 17                 | North Spirit Lake                         | North Spirit<br>Lake                                            | BWA | 08/01/2001                             | 35 people                           | - equipment malfunction during treatment or distribution<br>(circuit board needs to be repaired)                                                                             |
| 18                 | Pikangikum                                | Pikangikum                                                      | BWA | 10/17/2005<br>09/20/2006<br>09/21/2006 | 2 public buildings &<br>1716 people | - equipment malfunction during treatment or distribution<br>(section of distribution system needs to be repaired)-<br>- unacceptable microbiological quality                 |
| 19                 | Poplar Hill                               | Poplar Hill                                                     | BWA | 07/18/2006                             | 81 people                           | - inadequate disinfection or disinfectant residual                                                                                                                           |
| 20                 | Sandy Lake                                | Sandy Lake                                                      | BWA | 10/10/2002                             | 956 people                          | - inadequate disinfection or disinfectant residual                                                                                                                           |
| 21                 | Slate Falls Nation                        | New Slate Falls<br>(11 CWS)                                     | BWA | 07/07/2004                             | 2 public buildings &<br>152 people  | - inadequate disinfection or disinfectant residual<br>- unacceptable turbidities or particle counts                                                                          |
| 22                 | Wawakapewin                               | Long Dog                                                        | BWA | 03/03/2004                             | 35 people                           | -equipment malfunction during treatment or distribution                                                                                                                      |
| <b>Southern</b>    |                                           |                                                                 |     |                                        |                                     |                                                                                                                                                                              |
| 23                 | Mohawks of the Bay<br>of Quinte           | Tyendinaga<br>(1 building & 2<br>distribution<br>systems)       | BWA | 10/17/2003<br>10/20/2005<br>02/08/2008 | 50 people & 2 public<br>buildings   | - inadequate disinfection or disinfectant residuals<br>- unacceptable microbiological quality<br>-equipment malfunction during treatment or distribution                     |
| 24                 | Wasauksing First<br>Nation                | School Turn<br>Pump House                                       | BWA | 02/15/2002                             | 30 people                           | - inadequate disinfection or disinfectant residuals                                                                                                                          |
| <b>Thunder Bay</b> |                                           |                                                                 |     |                                        |                                     |                                                                                                                                                                              |
| 25                 | Anishnabe of<br>Wauzhushk Onigum          | Wauzhushk<br>Onigum - Rat<br>Portage                            | BWA | 03/14/2003                             | 14 people                           | - inadequate disinfection or disinfectant residuals<br>- unacceptable turbidities or particle counts                                                                         |
| 26                 | Biinjitiwaabik<br>Zaaging<br>Anishinaabek | Rocky Bay First<br>Nation                                       | BWA | 02/29/2008                             | 318 people                          | - equipment malfunction during treatment or distribution<br>-inadequate disinfection or disinfectant residuals                                                               |
| 27                 | Martin Falls                              | Marten Falls<br>First Nation                                    | BWA | 07/18/2005                             | 277 people                          | - inadequate disinfection or disinfectant residuals<br>-unacceptable turbidities or particle counts                                                                          |
| 28                 | Naotkamegwa                               | Naotkamegwann<br>ing                                            | BWA | 08/31/2006                             | 488 people                          | - inadequate disinfection or disinfectant residuals                                                                                                                          |
| 29                 | Nipissing First<br>Nation                 | Beaucage<br>Village                                             | BWA | 04/16/2007                             |                                     | -unacceptable turbidities or particle counts                                                                                                                                 |
| 30                 | North West Angle<br>No. 33                | N. W. Angle 33<br>Dog Paw                                       | BWA | 10/10/2000                             | 65 people                           | - inadequate disinfection or disinfectant residuals                                                                                                                          |
| 31                 | North West Angle<br>No. 37                | N. W. Angle 37<br>Regina Bay                                    | BWA | 09/26/2002                             | 102 people                          | - inadequate disinfection or disinfectant residuals                                                                                                                          |
| 32                 | North West Angle<br>No. 37                | N.W. Angle 37<br>Windigo Island                                 | BWA | 06/12/2007                             |                                     | - inadequate disinfection or disinfectant residuals                                                                                                                          |
| 33                 | Pic Mobert                                | Pic Mobert First<br>Nation                                      | BWA | 02/26/2008                             | 295 people                          | - equipment malfunction during treatment or distribution<br>-inadequate disinfection or disinfectant residuals                                                               |
| 34                 | Shoal Lake No. 40                         | Shoal Lake No.<br>40 (#1,2,3,4,9 &<br>School Pump<br>House CWS) | BWA | 12/06/2000<br>11/01/2007               | 360 people                          | - equipment malfunction during treatment or distribution<br>(being upgraded)<br>- inadequate disinfection or disinfectant residual<br>- unacceptable microbiological quality |

|                 |                      |                   |                     |            |                                  |                                                                                                                                                                                        |
|-----------------|----------------------|-------------------|---------------------|------------|----------------------------------|----------------------------------------------------------------------------------------------------------------------------------------------------------------------------------------|
| <b>Manitoba</b> |                      |                   |                     |            |                                  |                                                                                                                                                                                        |
|                 | First Nation         | Community         | Type of<br>advisory | Date Set   | Population/ building<br>affected | Trigger                                                                                                                                                                                |
| 1               | Gods Lake<br>Narrows | Gods Lake Narrows | BWA                 | 04/24/2005 | 15 houses                        | - unacceptable bacteriological results<br>- equipment malfunction during treatment or distribution<br>(pump house ran out of chlorine and needs to be<br>monitored daily for chlorine) |

| Saskatchewan |                   |                    |                  |            |                               |                                                                                     |
|--------------|-------------------|--------------------|------------------|------------|-------------------------------|-------------------------------------------------------------------------------------|
|              | First Nation      | Community          | Type of advisory | Date Set   | Population/ building affected | Trigger                                                                             |
| 1            | Black Lake        | Black Lake         | BWA              | 01/16/2007 |                               | - operational problems                                                              |
| 2            | Clear Water River | The Landing        | BWA              | 04/24/2006 | 5 houses                      | -no piped water or sewage disposal.                                                 |
| 3            | Cumberland House  | Cumberland House   | BWA              | 2003       | 2 public buildings & 5 houses | - bacteriological quality                                                           |
| 4            | Kinookimaw        | Kinookimaw         | BWA              | 06/14/2006 | 1 public building & 60 houses | -unacceptable chlorine residuals                                                    |
| 5            | Makwa Sahgaiehcan | Makwa Sahgaiehcan  | BWA              | 03/09/2007 |                               | - unacceptable chlorine residuals                                                   |
| 6            | Island Lake       | Island Lake        | BWA              | 03/09/2007 |                               | - operational problems                                                              |
| 7            | Muscowpetung      | Muscowpetung       | BWA              | 12/19/2006 | 1 public building             | - unacceptable chlorine residuals                                                   |
| 8            | Okanese           | Okanese            | BWA              | 04/11/2006 | Community                     | - fluctuating chlorine residuals                                                    |
| 9            | Poundmaker        | Poundmaker         | BWA              | 09/18/2003 | 60 houses & 1 public building | - inadequate disinfection or disinfectant residual                                  |
| 10           | Red Earth         | Red Earth          | BWA              | 04/20/2006 | 700 people                    | -potential flooding in the community, this advisory was issued after the evacuation |
| 11           | Shoal Lake        | Shoal Lake         | BWA              | 07/06/2006 | 657 people                    | -unacceptable turbidity levels                                                      |
| 12           | Star Blanket      | Star Blanket       | BWA              | 01/10/2007 |                               | - unacceptable chlorine residuals and plant operation                               |
| 13           | Star Blanket      | Wa-Pii Moos-Toosis | BWA              | 01/10/2007 | Community                     | - unacceptable chlorine residuals and plant operation                               |
| 14           | Sweetgrass        | Sweetgrass         | BWA              | 01/11/2002 | 15 houses                     | - inadequate disinfection or disinfectant residual                                  |
| 15           | White Bear        | White Bear         | BWA              | 08/02/2007 |                               | -operation of system would compromise public health                                 |

| Alberta |                              |                   |                   |                          |                               |                                                                                                           |
|---------|------------------------------|-------------------|-------------------|--------------------------|-------------------------------|-----------------------------------------------------------------------------------------------------------|
|         | First Nation                 | Community         | Type of advisory  | Date Set                 | Population/ building affected | Trigger                                                                                                   |
| 1       | Alexis                       | Alexis            | BWA               | 08/21/2007               | 5 houses                      | - inadequate disinfection or disinfectant residual<br>-operation of system would compromise public health |
| 2       | Bigstone Cree Nation         | Sandy Lake        | BWA               | 10/31/2007               | 1 public building             | - unacceptable microbiological quality                                                                    |
| 3       | Blood                        | Blood General     | BWA               | 06/26/2006               | 1 public building             | -significant deterioration in source water quality<br>-unacceptable microbiological quality               |
| 4       | Frog Lake                    | Frog Lake         | BWA               | 08/03/2007               | 165 people                    | - unacceptable microbiological quality<br>- inadequate disinfection or disinfectant residuals             |
| 5       | Little Red River Cree Nation | John D'or Prairie | BWA (1CWS + 1TWS) | 01/19/2008               | 902 people                    | -significant deterioration in source water quality<br>-unacceptable turbidity levels                      |
| 6       | O'Chiese                     | O'Chiese          | BWA               | 08/30/2007<br>01/15/2008 | 3 public buildings            | - inadequate disinfection or disinfectant residual<br>- unacceptable microbiological quality              |
| 7       | Stoney Tribe                 | Morley Reserve    | BWA               | 10/20/2006               | 1 public building             | - unacceptable microbiological quality                                                                    |
| 8       | Tsuu Tina Nation             | Tsuu Tina         | BWA               | 10/10/2006               | 3 public buildings            | - unacceptable microbiological quality                                                                    |

| Pacific |                     |                   |                  |            |                               |                                                                                                                 |
|---------|---------------------|-------------------|------------------|------------|-------------------------------|-----------------------------------------------------------------------------------------------------------------|
|         | First Nation        | Community         | Type of advisory | Date Set   | Population/ building affected | Trigger                                                                                                         |
| Central |                     |                   |                  |            |                               |                                                                                                                 |
| 1       | Adams Lake          | Sahhaltkum        | BWA              | 10/08/2004 | 16 people                     | - unacceptable microbiological quality                                                                          |
| 2       | Lower Nicola        | Rocky Pine        | BWA              | 01/13/2006 | 300 people                    | - unacceptable microbiological quality                                                                          |
| 3       | Little Shuswap Lake | Tappen            | BWA              | 10/19/2007 | 44 people                     | - unacceptable microbiological quality                                                                          |
| 4       | Okanagan            | Bradley Creek     | BWA              | 09/15/2004 | 50 people                     | - unacceptable microbiological quality                                                                          |
| 5       | Spuzzum             | Spuzzum           | BWA              | 06/30/2003 | 56 people                     | - inadequate disinfection or disinfectant residuals                                                             |
| 6       | T'it'q'et           | Seton Lake Cabins | BWA              | 07/24/2007 | 25 people                     | - equipment malfunction during treatment or distribution<br>- inadequate disinfection or disinfectant residuals |

|          |                               |                           |     |                          |                   |                                                                                                                                                                                                                         |
|----------|-------------------------------|---------------------------|-----|--------------------------|-------------------|-------------------------------------------------------------------------------------------------------------------------------------------------------------------------------------------------------------------------|
| 7        | Upper Nicola                  | Douglas Lake CWS          | BWA | 01/09/2008               | 203 people        | - equipment malfunction during treatment or distribution                                                                                                                                                                |
| 8        | Xaxli'p                       | Main Reserve              | BWA | 09/12/2007               | 146 people        | - unacceptable microbiological quality                                                                                                                                                                                  |
| Coastal  |                               |                           |     |                          |                   |                                                                                                                                                                                                                         |
| 9        | Cowichan                      | Cowichan                  | BWA | 09/24/2007               | 36 people         | - equipment malfunction during treatment or distribution<br>- inadequate disinfection or disinfectant residuals<br>- unacceptable microbiological quality                                                               |
| 10       | Ehattesaht                    | Chenakhint                | BWA | 06/23/2006               | 306 people        | -significant deterioration in source water quality<br>-inadequate disinfection or disinfectant residuals<br>-unacceptable microbiological quality<br>-operation of system would compromise public health                |
| 11       | Nanoose First Nation          | Nanoose                   | BWA | 10/12/2007               | 180 people        | -unacceptable microbiological quality                                                                                                                                                                                   |
| 12       | Pacheedaht                    | Gordon River              | BWA | 09/26/2007               | 86 people         | -unacceptable microbiological quality                                                                                                                                                                                   |
| 13       | Oweekeno/<br>Wuikinuxv Nation | Katit                     | BWA | 02/04/2008               | 97 people         | - equipment malfunction during treatment or distribution<br>-unacceptable microbiological quality<br>-operation of system would compromise public health                                                                |
| 14       | Qualicum First Nation         | Qualicum                  | BWA | 06/15/2007               | 1 public building | -significant deterioration in source water quality<br>-unacceptable microbiological quality<br>-operation of system would compromise public health                                                                      |
| 15       | Semiahmoo                     | Semiahmoo                 | BWA | 10/13/2005               | 24 people         | - equipment malfunction during treatment or distribution<br>- unacceptable microbiological quality                                                                                                                      |
| 16       | Toquaht                       | Macoah                    | BWA | 03/27/2002               | 30 people         | - inadequate disinfection or disinfectant residual<br>-unacceptable microbiological quality<br>-operation of system would compromise public health<br>(new water source is needed; bottled water is being provided)     |
| Northern |                               |                           |     |                          |                   |                                                                                                                                                                                                                         |
| 17       | Alexis Creek                  | Alexis Creek              | BWA | 04/01/1999<br>10/15/2003 | 296 people        | - unacceptable microbiological quality<br>-operation of system would compromise public health<br>(operator and continued maintenance needed)                                                                            |
| 18       | Canoe Creek                   | Canoe Creek               | BWA | 03/01/1999               | 60 people         | - equipment malfunction during treatment or distribution<br>- unacceptable microbiological quality<br>- operation of system would compromise public health<br>(engineering and operational issues need to be addressed) |
| 19       | Esketemc                      | Esket Community           | BWA | 10/21/2004               | 699 people        | - unacceptable microbiological quality<br>- operation of system would compromise public health (in engineering design phase, water protection improvements needed)                                                      |
| 20       | Lake Babine Nation            | Fort Babine               | BWA | 09/30/1999               | 161 people        | - inadequate disinfection or disinfectant residual<br>- unacceptable microbiological quality<br>-operation of system would compromise public health                                                                     |
| 21       | Nadleh Whuten                 | Nautley                   | BWA | 06/01/2004               | 191 people        | - inadequate disinfection or disinfectant residual                                                                                                                                                                      |
| 22       | Nazko                         | Nazko                     | DNC | 01/01/1999               | 157 people        | - operation of system would compromise public health                                                                                                                                                                    |
| 23       | Takla Lake First Nation       | Takla Lake                | BWA | 06/16/2004               | 352 people        | - inadequate disinfection or disinfectant residual<br>- unacceptable microbiological quality<br>- operation of system would compromise public health<br>(new system being constructed)                                  |
| 24       | Tl'azt'en Nation              | Binche (Aka Pinchie)      | BWA | 04/12/2006               | 110 people        | - inadequate disinfection or disinfectant residuals                                                                                                                                                                     |
| 25       | Tl'azt'en Nation              | Dzitl'aini (Middle River) | BWA | 01/07/2005               | 66 people         | - equipment malfunction during treatment or distribution<br>(engineering issuing being addressed)<br>- inadequate disinfection or disinfectant residual<br>- unacceptable microbiological quality                       |
| 26       | Toosey                        | Toosey                    | BWA | 11/25/2004               | 265 people        | - unacceptable microbiological quality<br>-operation of system would compromise public health                                                                                                                           |
| 27       | Williams Lake                 | Sugar Cane                | BWA | 07/31/2006               | 203 people        | - unacceptable microbiological quality                                                                                                                                                                                  |
| 28       | Xeni Gwet'in First Nation     | Lohbiee                   | BWA | 05/01/2001<br>10/18/2001 | 272 people        | -operation of system would compromise public health<br>-significant deterioration in the source water quality                                                                                                           |

Source: Health Canada
